# Supplementary material
Source: publisher figshare collection journal article supplement (https://frontiersin.figshare.com/ndownloader/files/24497525)

A

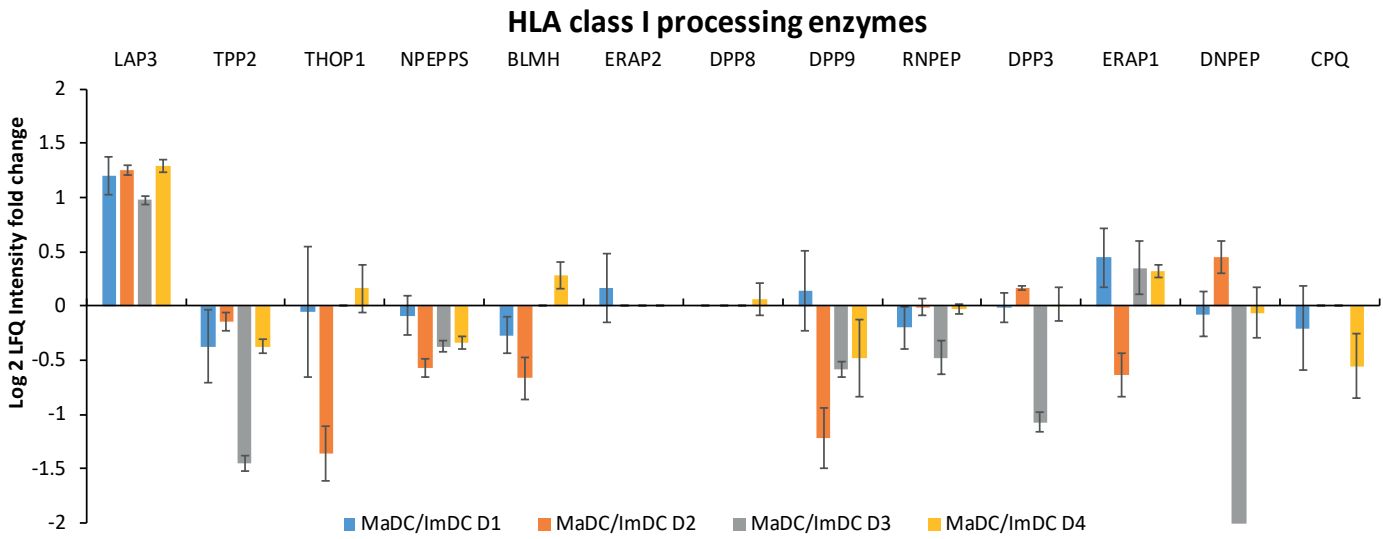

B

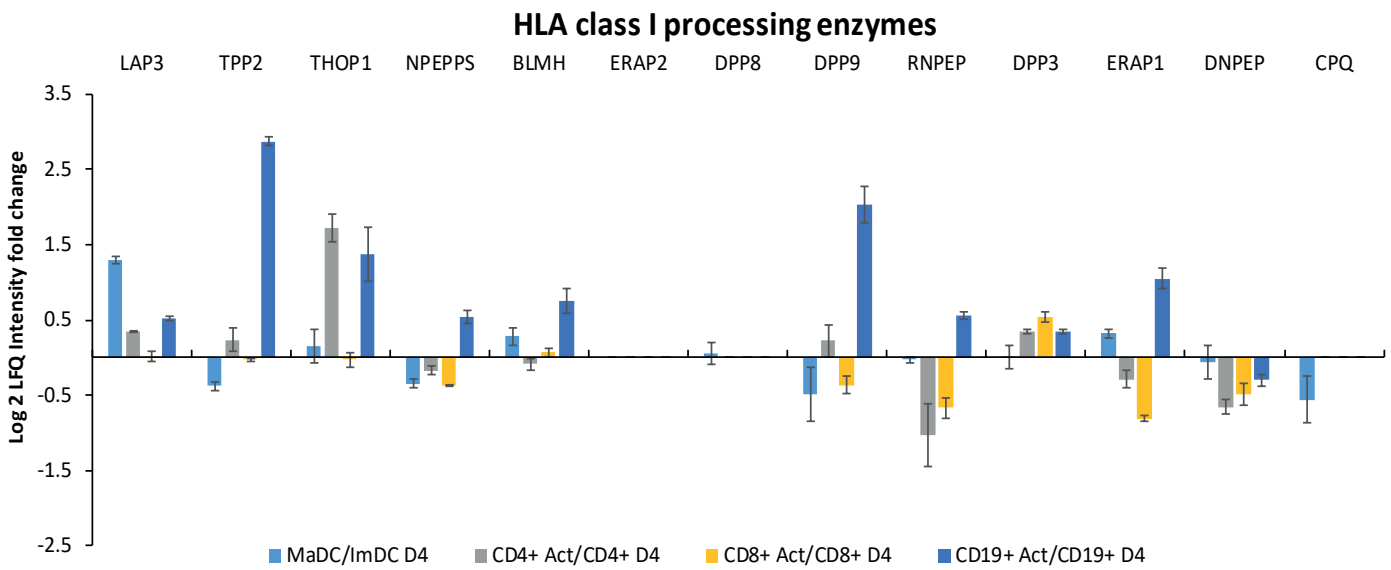

Supplement: Supplementary file [file 24497525]
